# Supplementary material for: Capturing a Tetratomic Nitrogen Ring cyclo-N4 inside an Aza[ 82 ]fullerene
Source: Research Square preprint supplement (doi:10.21203/rs.3.rs-816416/v1), 2021-08-31

## Supporting Information of

## Capturing a Tetratomic Nitrogen Ring *cyclo*-N4 inside an Aza[82]fullerene

**Yuanyuan Wang1†, Ziqi Hu1,3†*, Wangqiang Shen2†, Tonghui Zhou1†, Shinobu Aoyagi4, Yihao Yang1, Zhiyong Wang5, Pengwei Yu2, Jie Su1, Eugenio Coronado3, Xing Lu2* and Zujin Shi1***

1 National Laboratory for Molecular Sciences, State Key Laboratory of Rare Earth Materials Chemistry and Applications, College of Chemistry and Molecular Engineering, Peking University, Beijing 100871, People’s Republic of China.

2 State Key Laboratory of Materials Processing and Die & Mould Technology, School of Materials Science and Engineering, Huazhong University of Science and Technology, 1037 Luoyu Road, Wuhan 430074, People’s Republic of China.

3 Instituto de Ciencia Molecular, Universidad de Valencia, C/Catedrático José Beltrán 2, 46980 Paterna, Spain.

4 Graduate School of Natural Sciences, Nagoya City University, Nagoya, 467-8501, Japan.

5Department of Chemistry, Renmin University of China, Beijing 100872, People’s Republic of China.

†These authors contributed equally to this work.

**Contents**

**SI 1: Separations**

**SI 2: LDI-TOF mass spectra**

**SI 3: Crystal structure**

**SI 4: DFT calculations**

**SI 1: Separations**

**Figure S1.1** Multi-stage HPLC separation of Dy2N4@C81N (**Dy-I**) with toluene as eluent and 310nm detection wavelength. **a)** The first stage: 20mm×250mm 5PYE column, flow rate: 15mL/min; **b)** the second stage: 20mm×250mm Buckyprep column, 12mL/min; **c)** the third stage: 20mm×250mm Buckyprep column, 15mL/min; **d)** the fourth stage: 10mm×250mm 5PBB column, 4mL/min; **e)** the final stage: 10mm×250mm 5PBB column, 4mL/min.


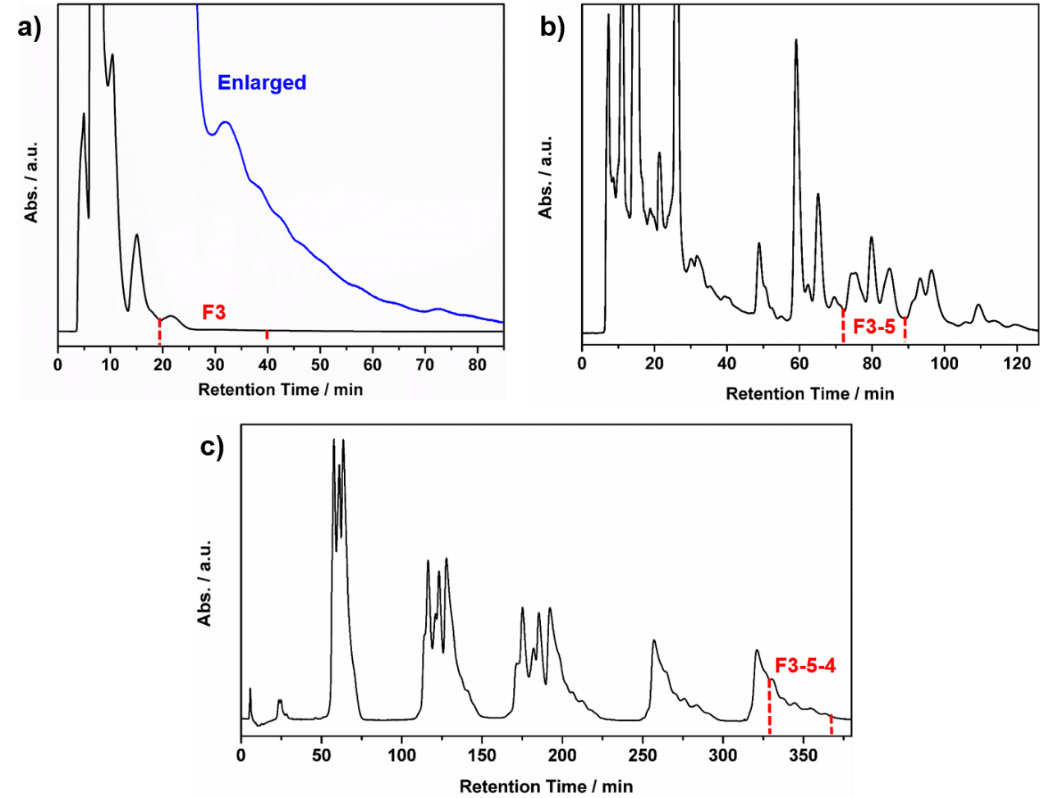


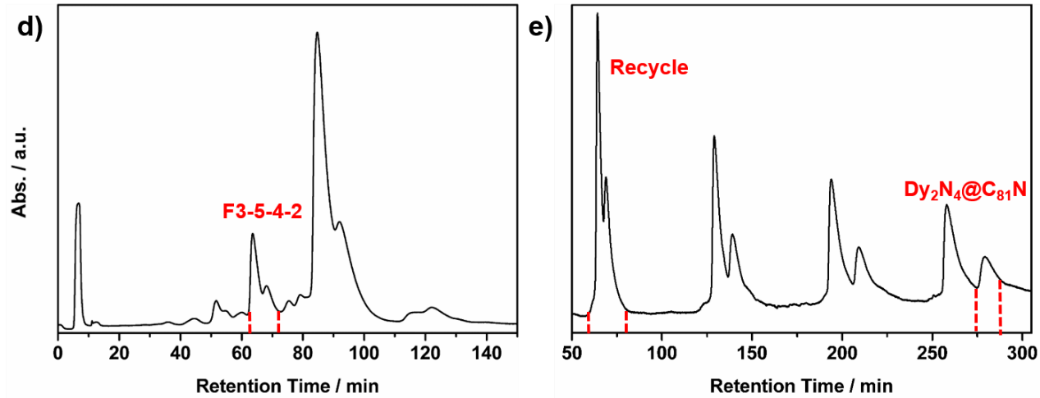


**Figure S1.2** Multi-stage HPLC separation of Y2N4@C81N (**Y-I**) with toluene as eluent and 310nm detection wavelength. **a)** The first stage: 20mm×250mm 5PYE column, flow rate: 15mL/min; **b)** the second stage: 20mm×250mm Buckyprep column, 12mL/min; **c)** the third stage: 20mm×250mm 5PBB column, 15mL/min; **d)** the final stage: 10mm×250mm Buckyprep column, 3mL/min.


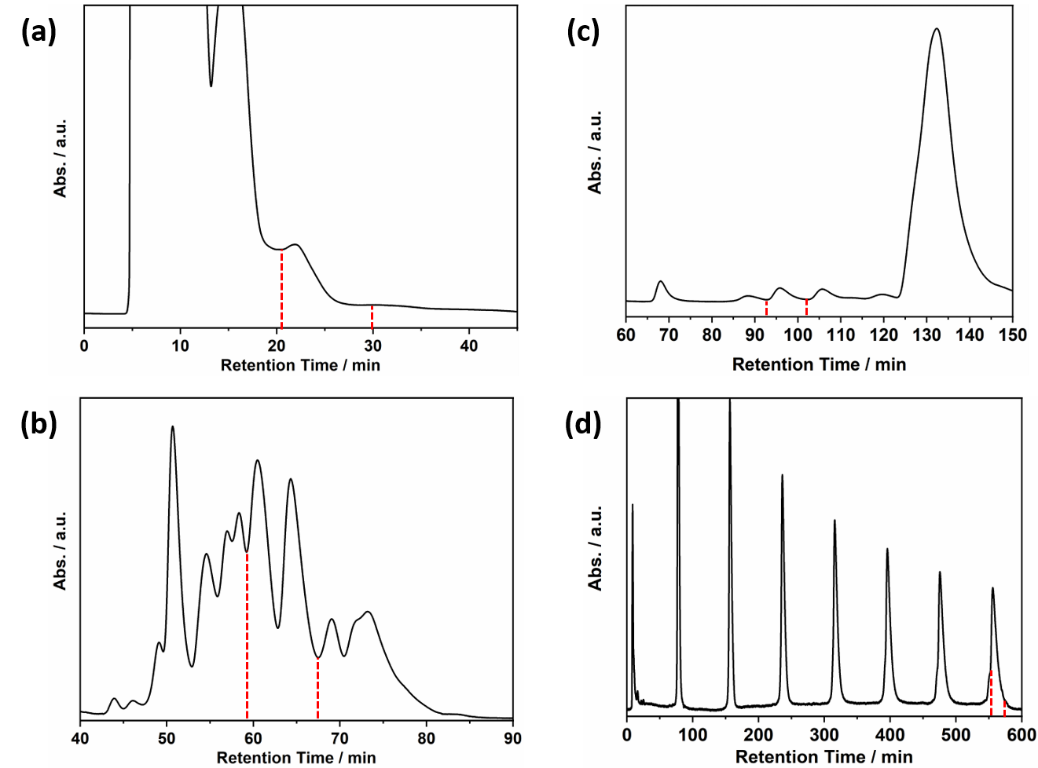


**Figure S1.3** Multi-stage HPLC separation of Dy2C2@*C*3*v*(8)-C82 with toluene as eluent and 310nm detection wavelength. **a)** The first stage: 20mm×250mm 5PYE column, flow rate: 15mL/min; **b)** the second stage: 20mm×250mm Buckyprep column, 12mL/min; **c)** the final stage: 20mm×250mm Buckyprep column, 12mL/min.


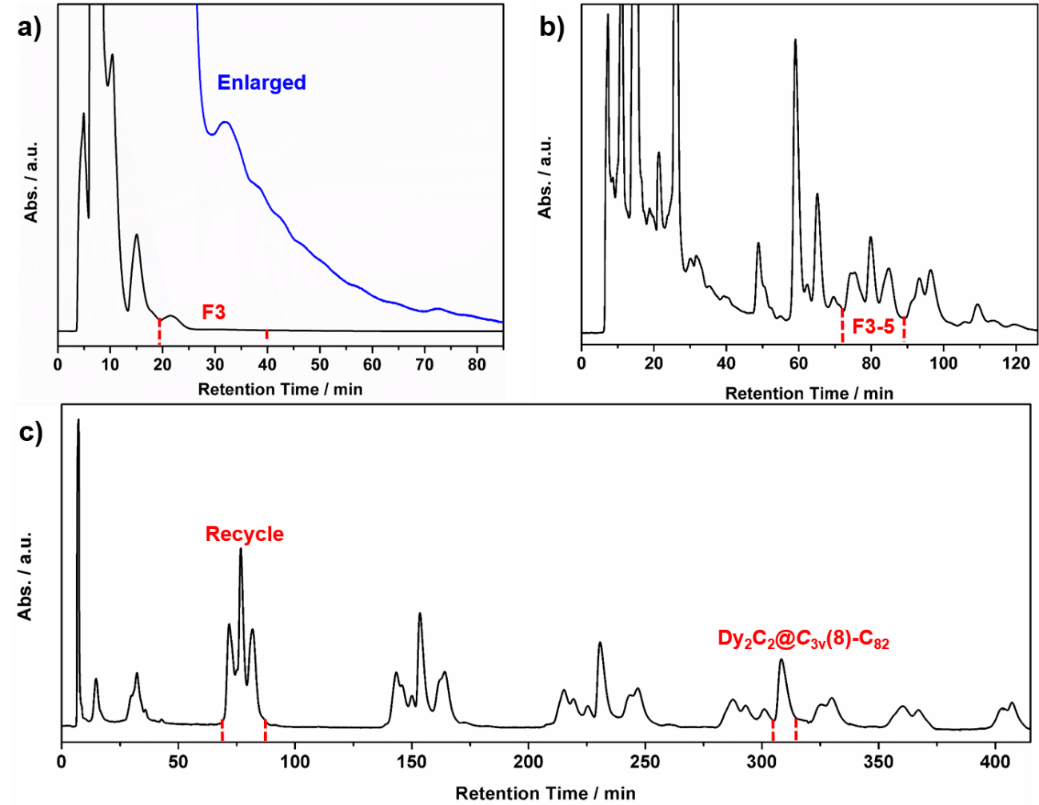


**SI 2: LDI-TOF mass spectra**

**Figure S2.1** LDI-TOF mass spectrum of purified Dy2C2@*C*3*v*(8)-C82. The insets show its measured and calculated isotopic distribution.


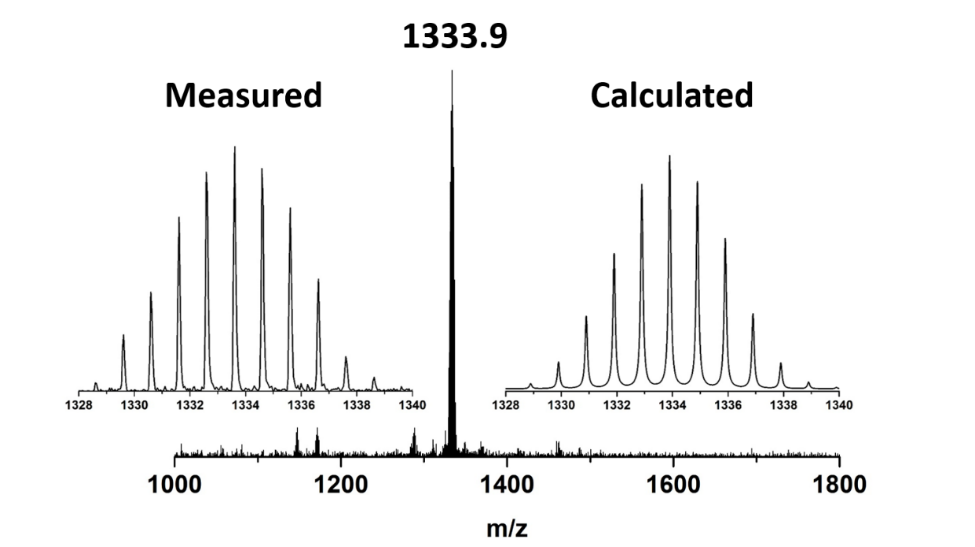


**Figure S2.2** LDI-TOF mass spectrum of purified Dy2C2@*C*3*v*(8)-C82. The insets show its measured and calculated isotopic distribution.

**
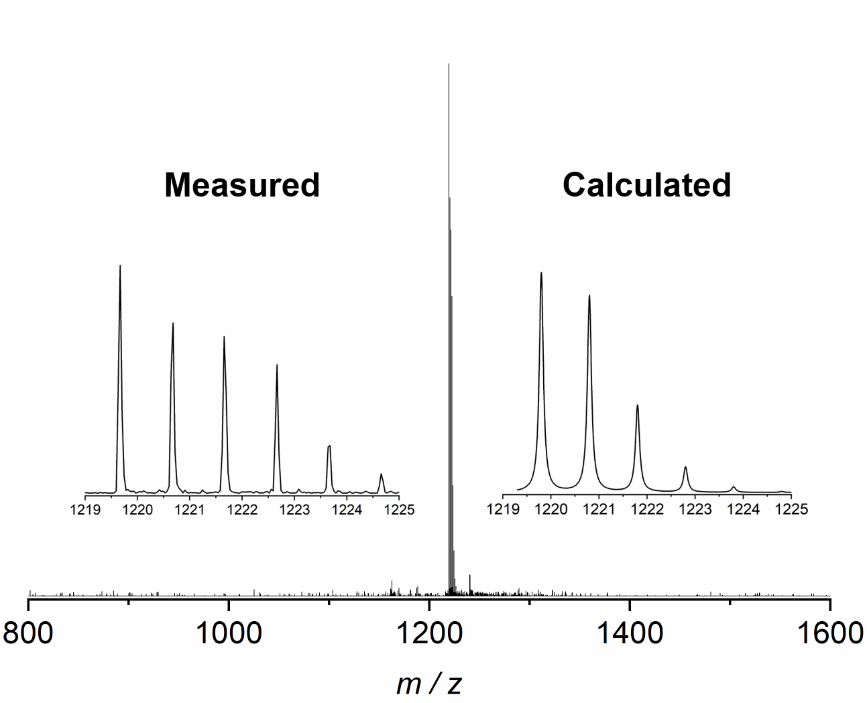
**

**SI 3: Crystal structure**


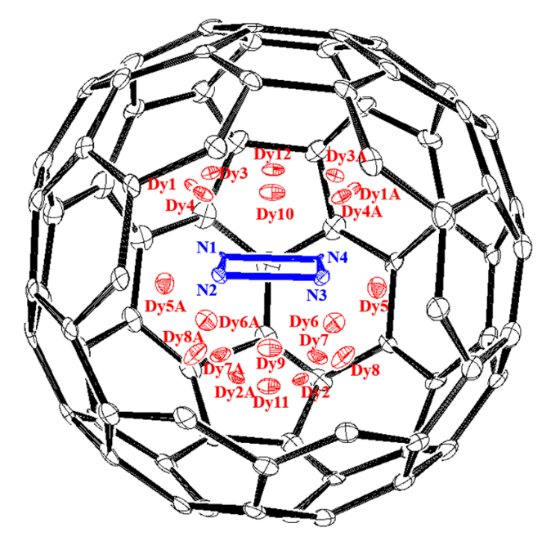
**Figure S3.1** Disordered Dy sites relative to the N4-unit in **Dy-I**. Those Dy sites labeled “A” are generated by crystallographic operation. The occupancies are following: Dy1, 0.27; Dy2, 0.19; Dy3, 0.08; Dy4, 0.07; Dy5, 0.07; Dy6, 0.06; Dy7, 0.06; Dy8, 0.04; Dy9, 0.16; Dy10, 0.08; Dy11, 0.05; Dy12, 0.03.

**Figure S3.2** Fragment view showing the relationship of the major Dy2N4 cluster relative to the closest cage portions.

**
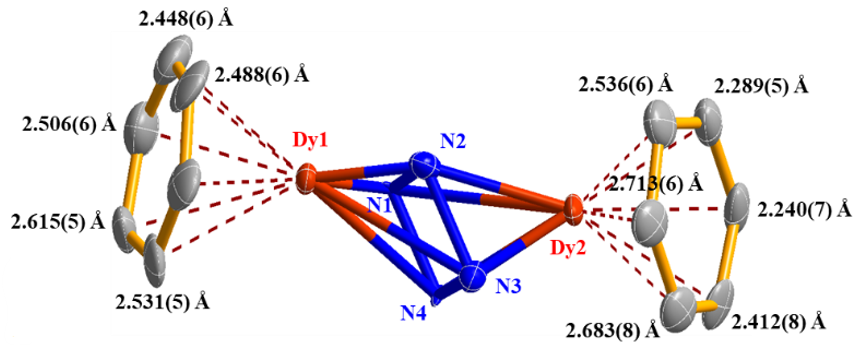
**

**SI 4: DFT calculations**

**Figure S4.1** Molecular structures of optimized Y2N4@C81N (**Y-I**) with the nitrogen substitution at different places on the cage: **a)** 566-junction at the middle of two metal ions, **b)** 666-junction and **c)** 566-junction while close to one metal ion. **a)** features the same nitrogen substitution location as **Dy-I** shown in **Figure 2a** and is the most stable structure. **b)** and **c)** are higher in energy of 21.4 kcal/mol and 27.6 kcal/mol, respectively. Higher-level optimization of **a)** using def2-TZVP basis set for C and N atoms with Grimme dispersion correction (DFT-D3) was further carried out to show the identical structure. The average N-N bond length of N4 unit in **Y-I** is 1.47 Å, same as in **Dy-I**.


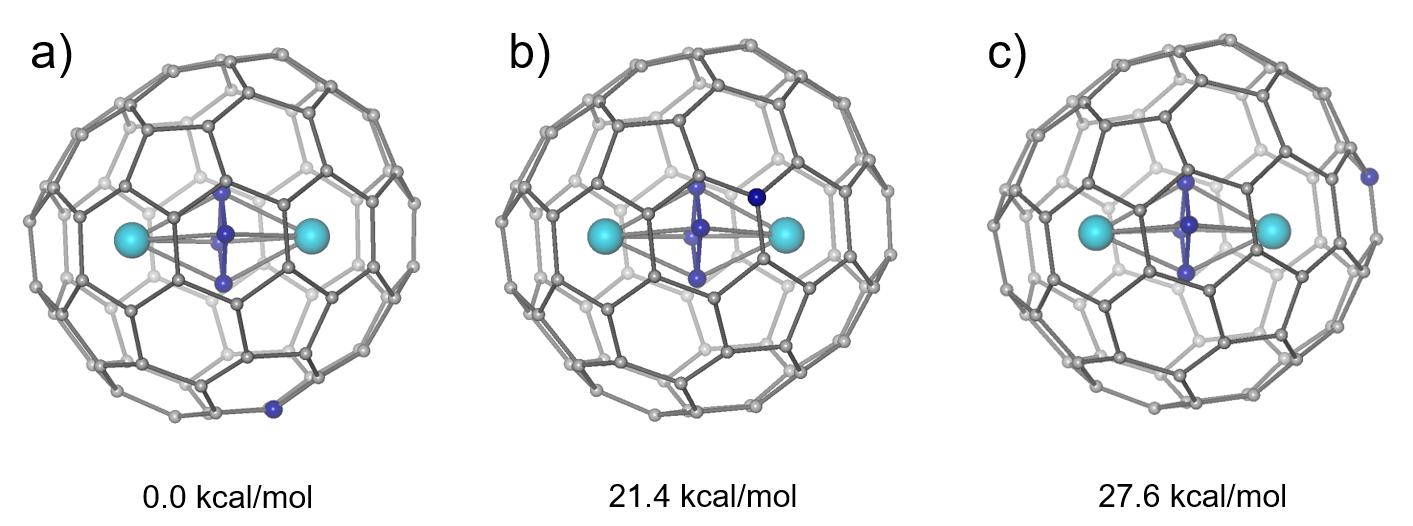


**Figure S4.2** Isosurface of SOMO in **Y-I**, showing identical cluster-based character as illustrated in **Figure 2c** for **Dy-I**.


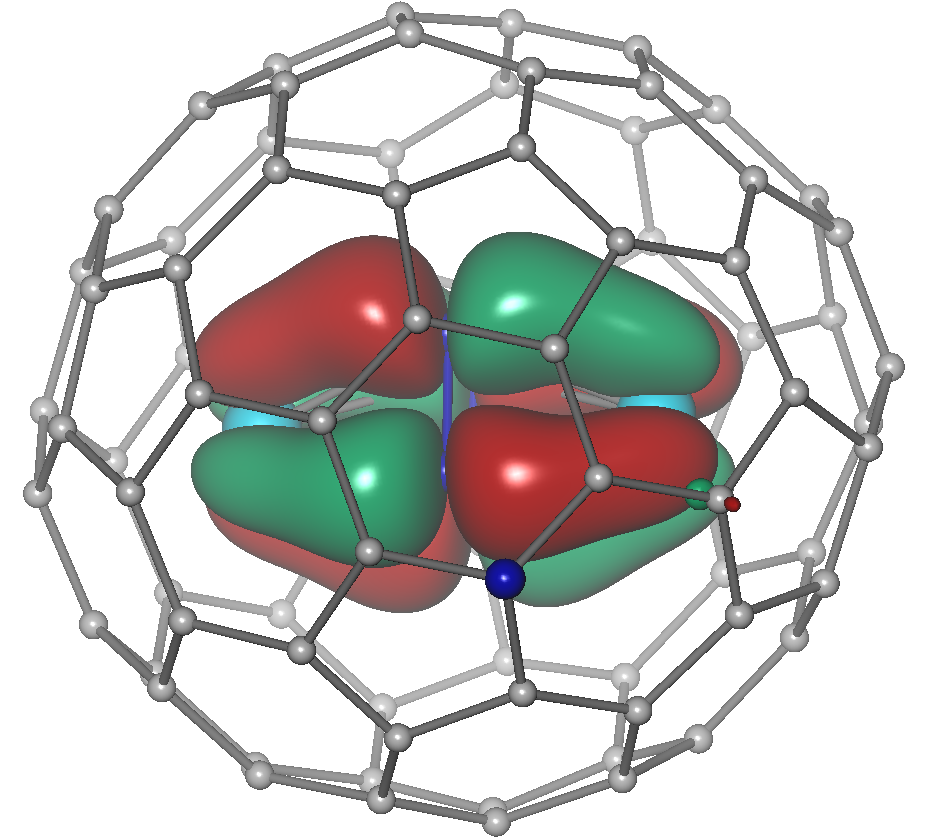


**Figure S4.3** Molecular structures of optimized **a) Dy-I** and its **b)** cation **Dy-I+** and **c)** anion **Dy-I-**.


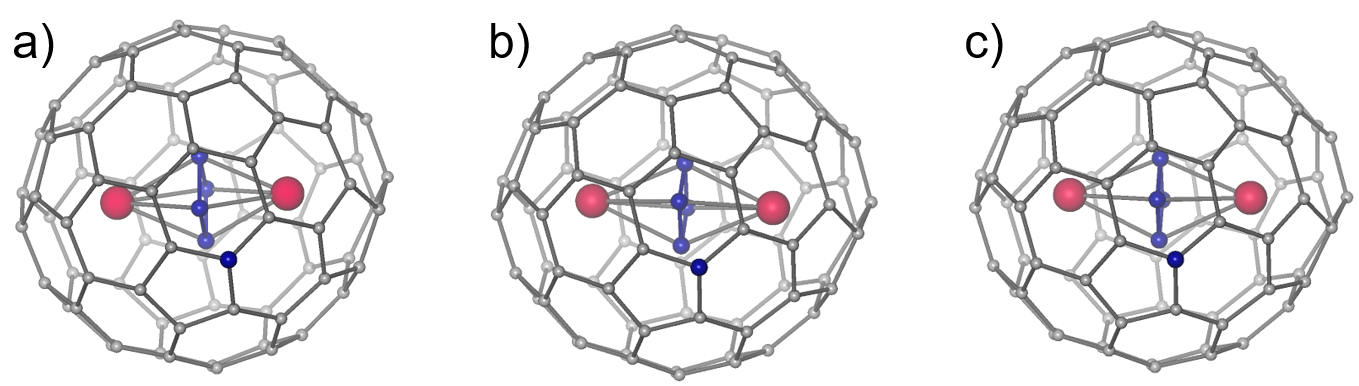


**Figure S4.4** Kohn–Sham MO energy levels (occupied—black, unoccupied—pink) of **Y-I**, **Dy-I**, **Dy-I**+ and **Dy-I**-. The red color indicates the M2N4 cluster-based orbitals. The energy values of **Dy-I**+ cation and **Dy-I**- anion orbitals are vertically translated for clarity. The dashed lines show the evolution of orbitals in neutral **Dy-I**molecule upon donating and accepting one electron, which result in **Dy-I**+ and **Dy-I**-, respectively. Spin-up (*α*) and spin-down (*β*) levels are shown separately for **Y-I** and **Dy-I**. The HOMO- or SOMO-LUMO gap in each case is indicated in blue with value in eV unit.


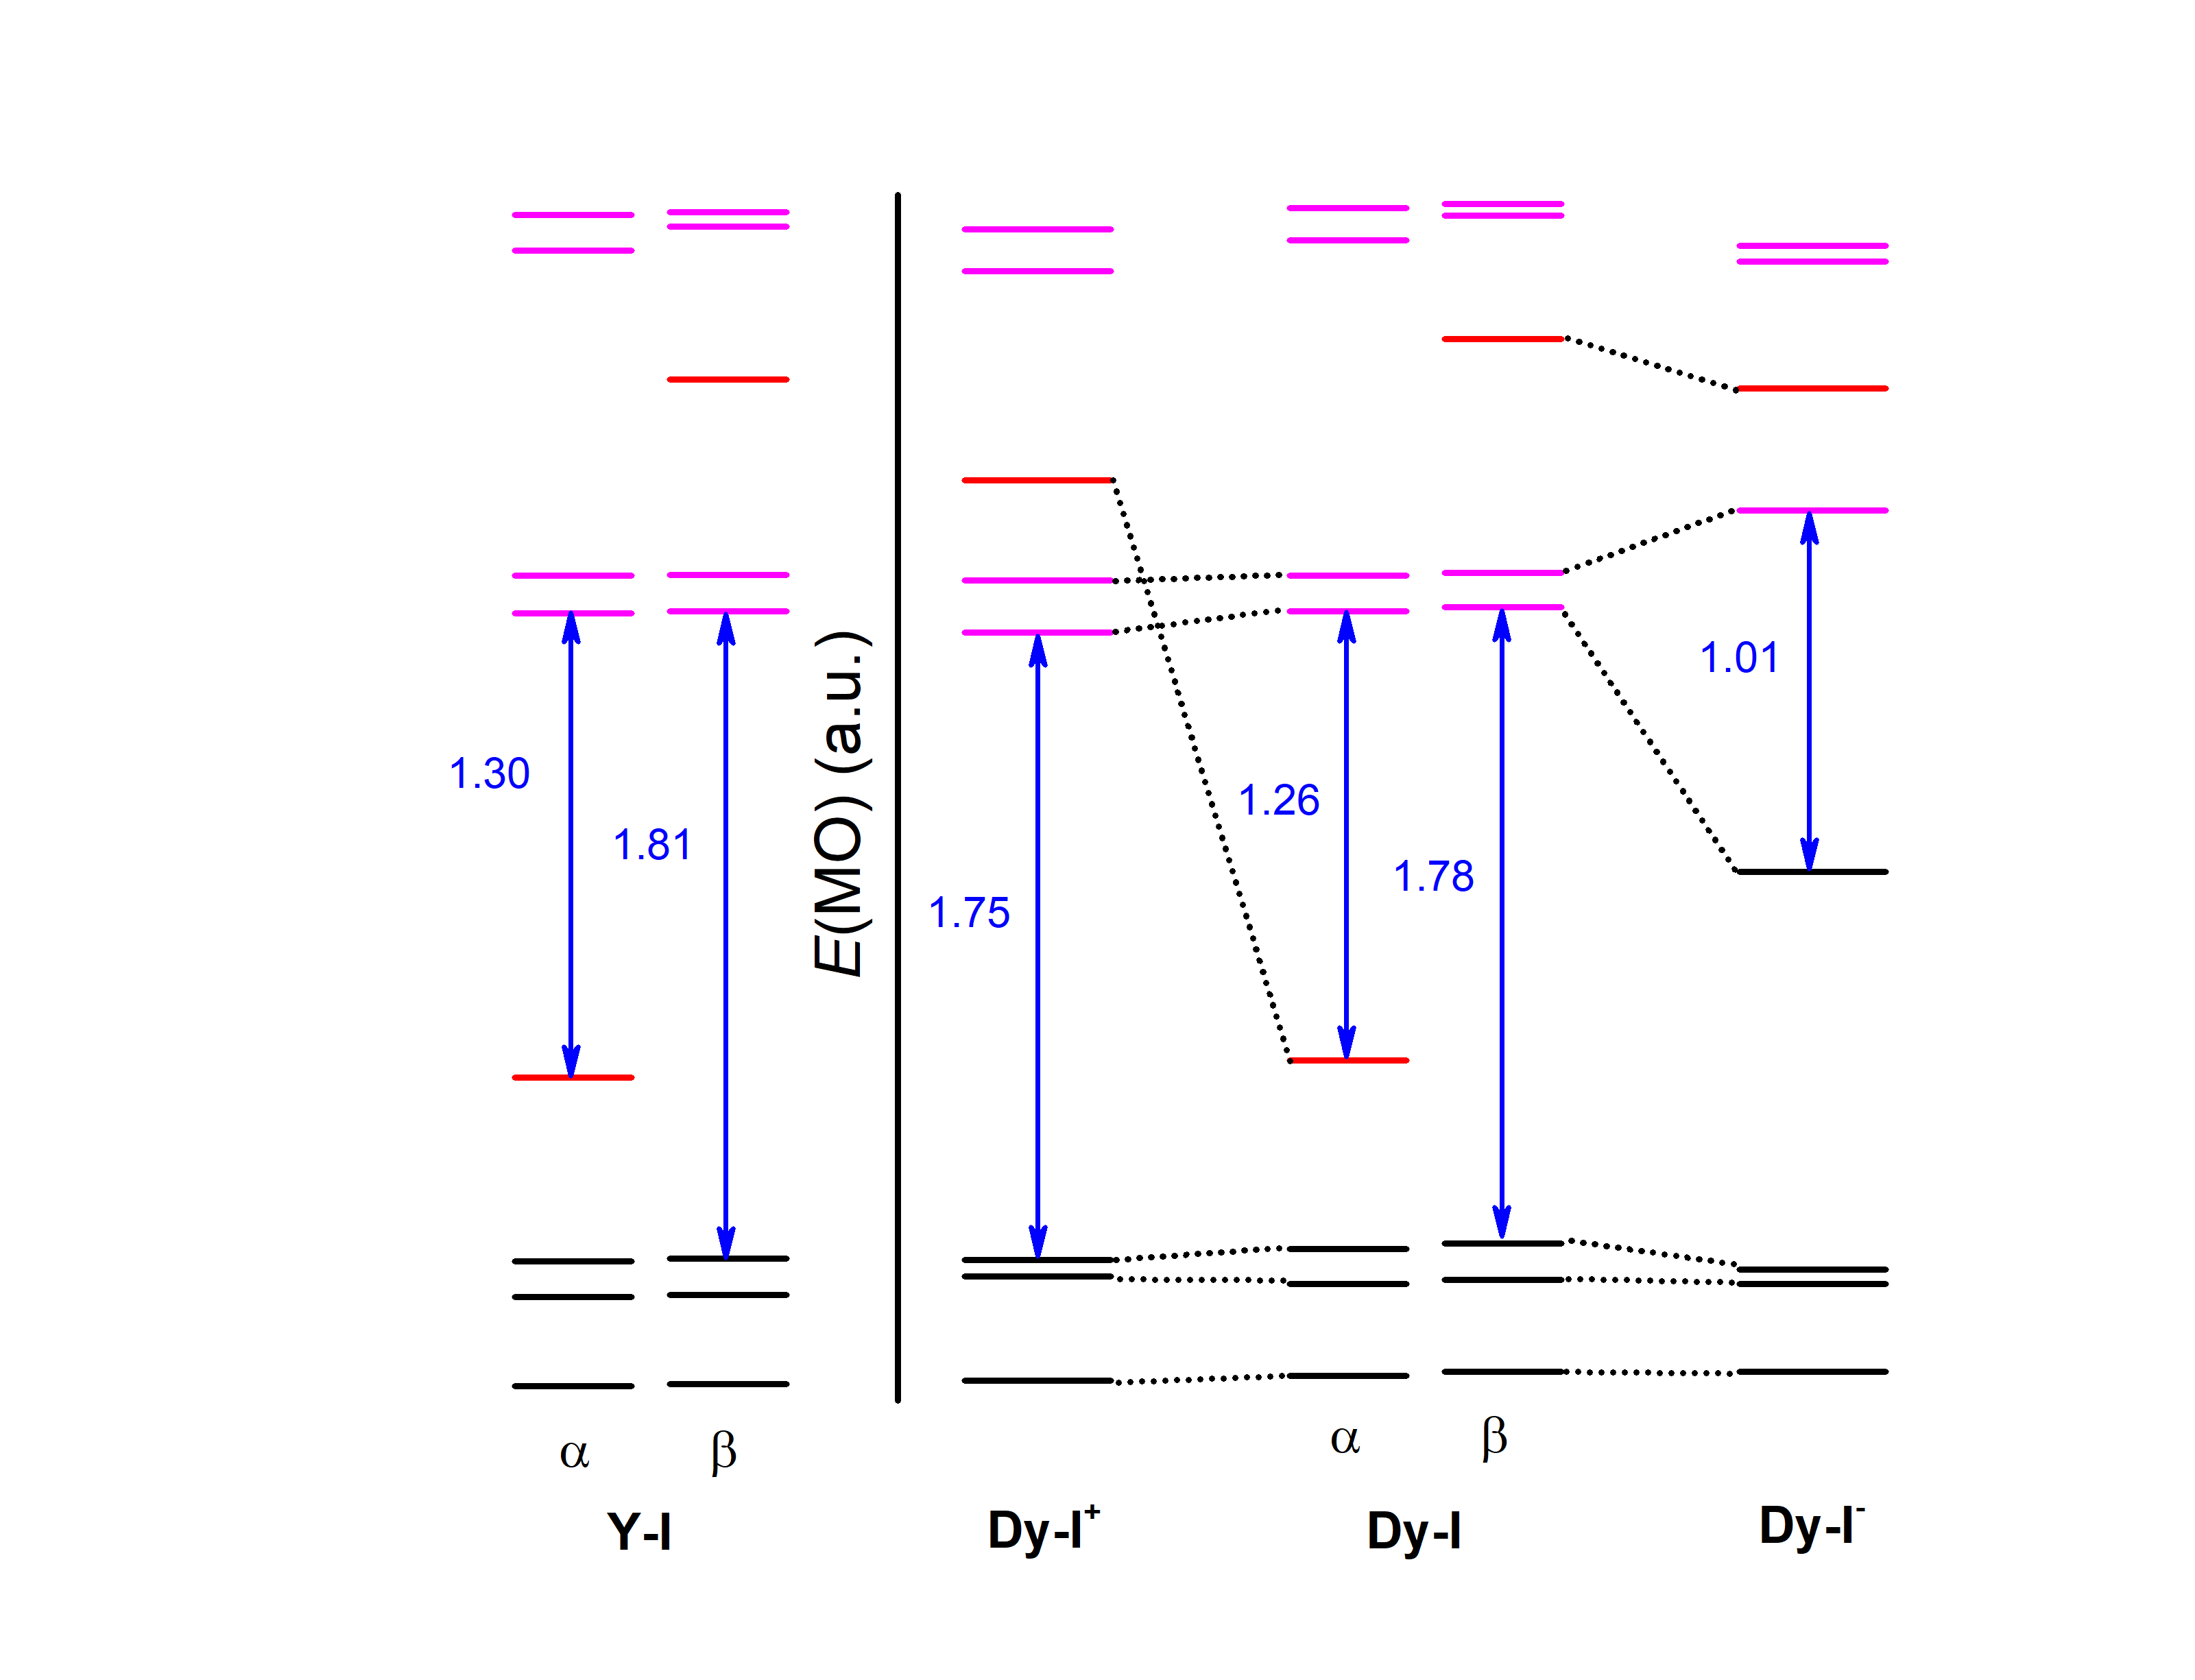

Supplement: Supplementary file 1 [file 0d0711812a47c32e0f5b3c51.docx]
